# Supplementary material
Source: HighWire-hosted journal article supplement (https://informatics.bmj.com/content/26/1/e100007)

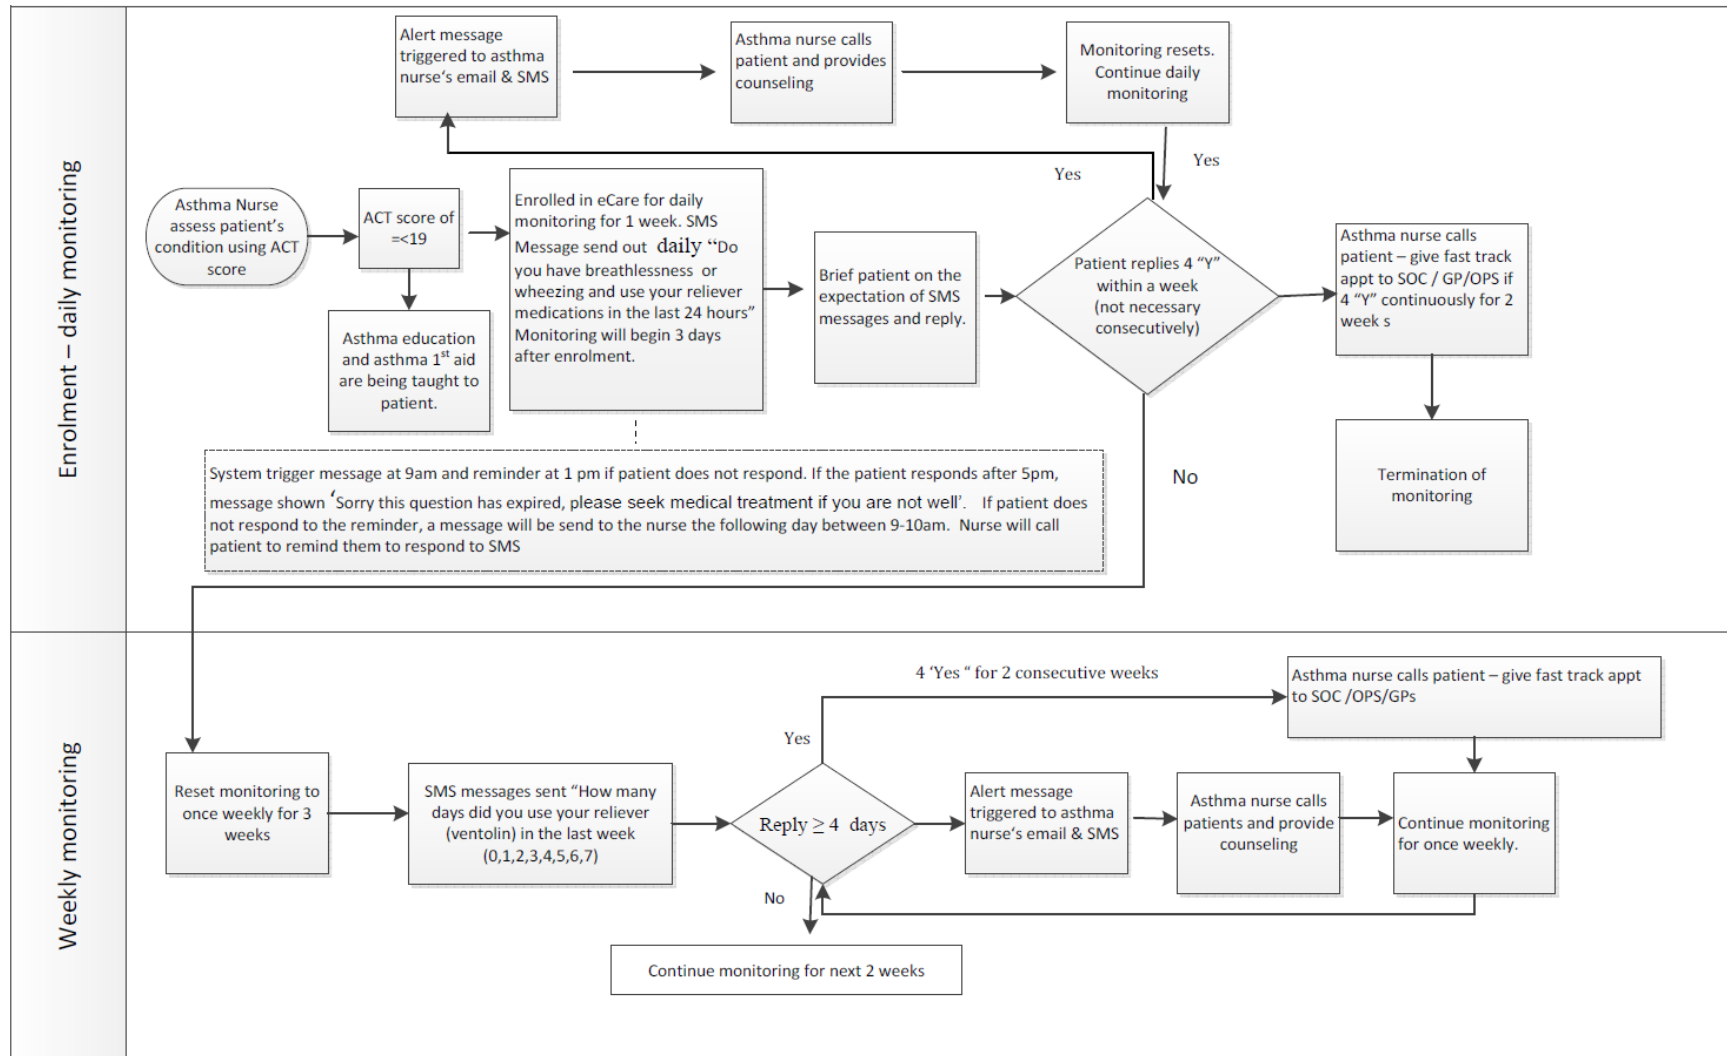

Figure S1: Workflow of the eCARE monitoring.

Supplement: inline-supplementary-material-1 [file inline-supplementary-material-1.pdf]
